# Supplementary material
Source: PubMed Central journal article supplement (PMC6786500)

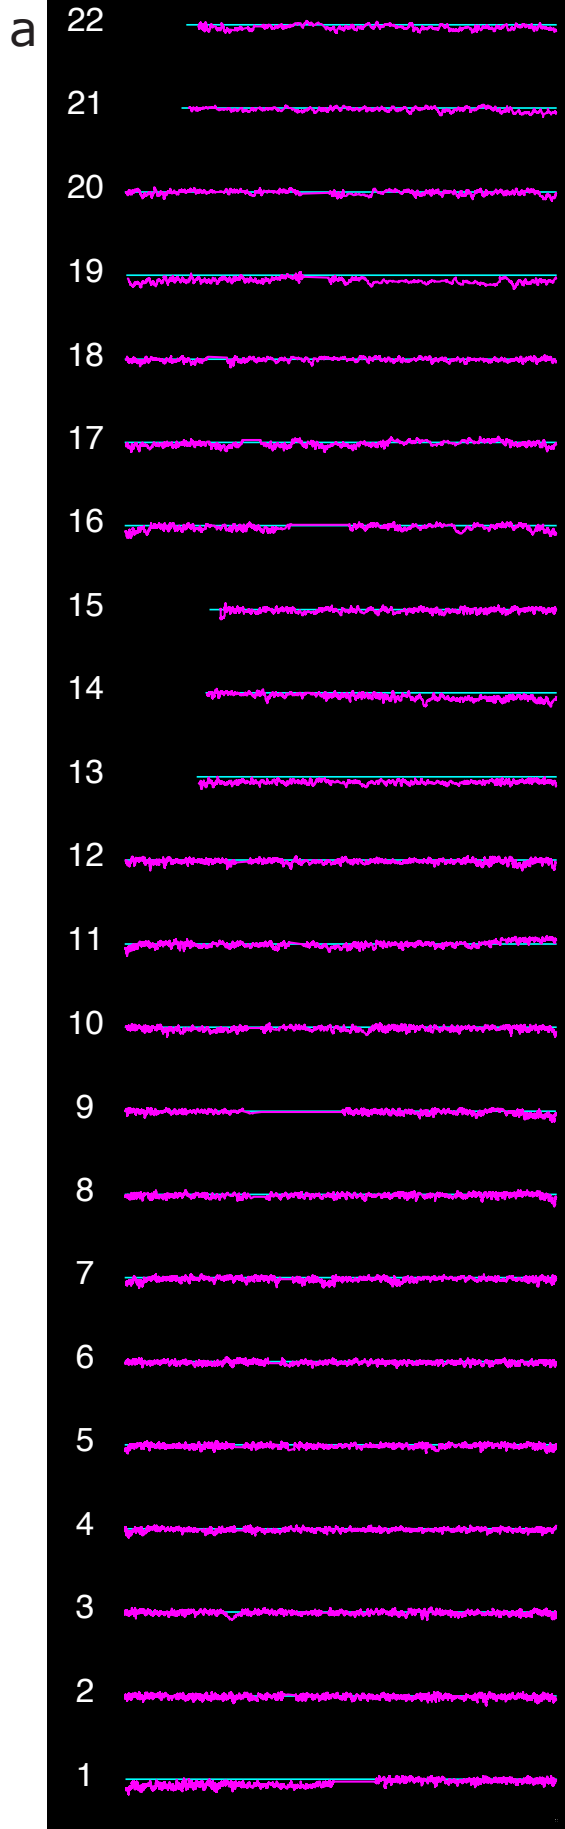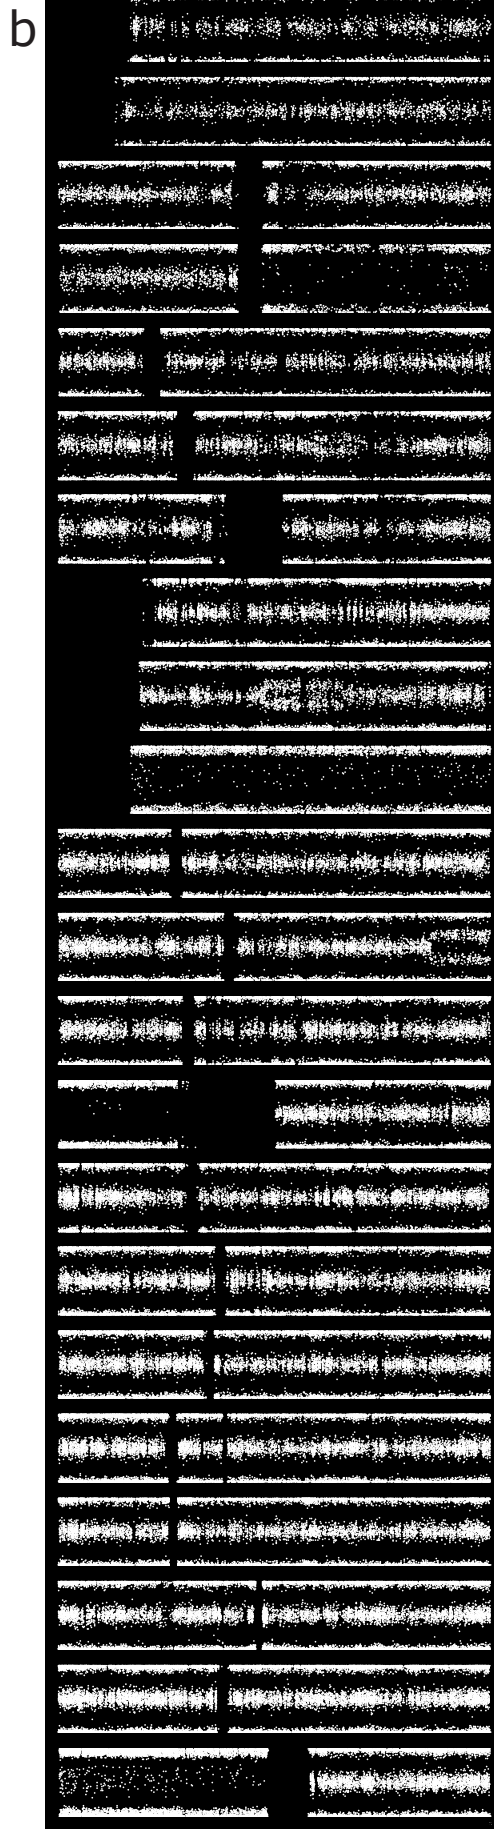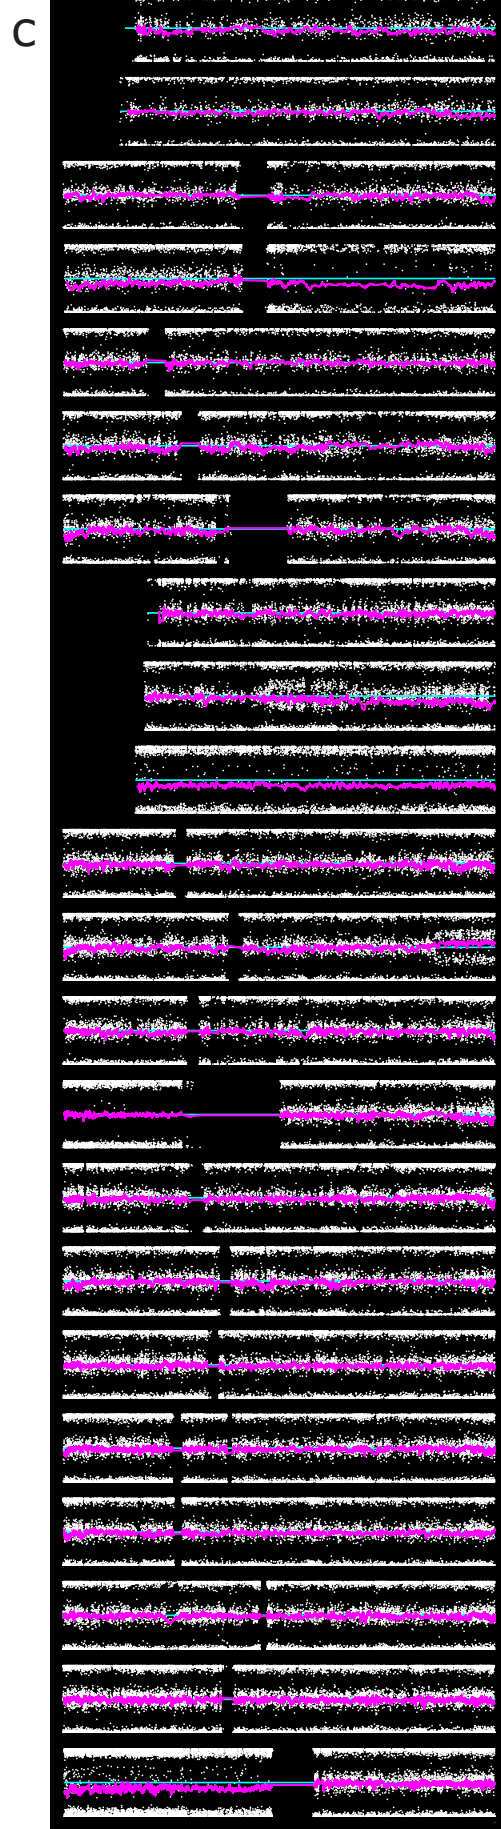

Supplement: NIHMS1001492-supplement-Supplementary_figure_1.pdf [file NIHMS1001492-supplement-Supplementary_figure_1.pdf]

a

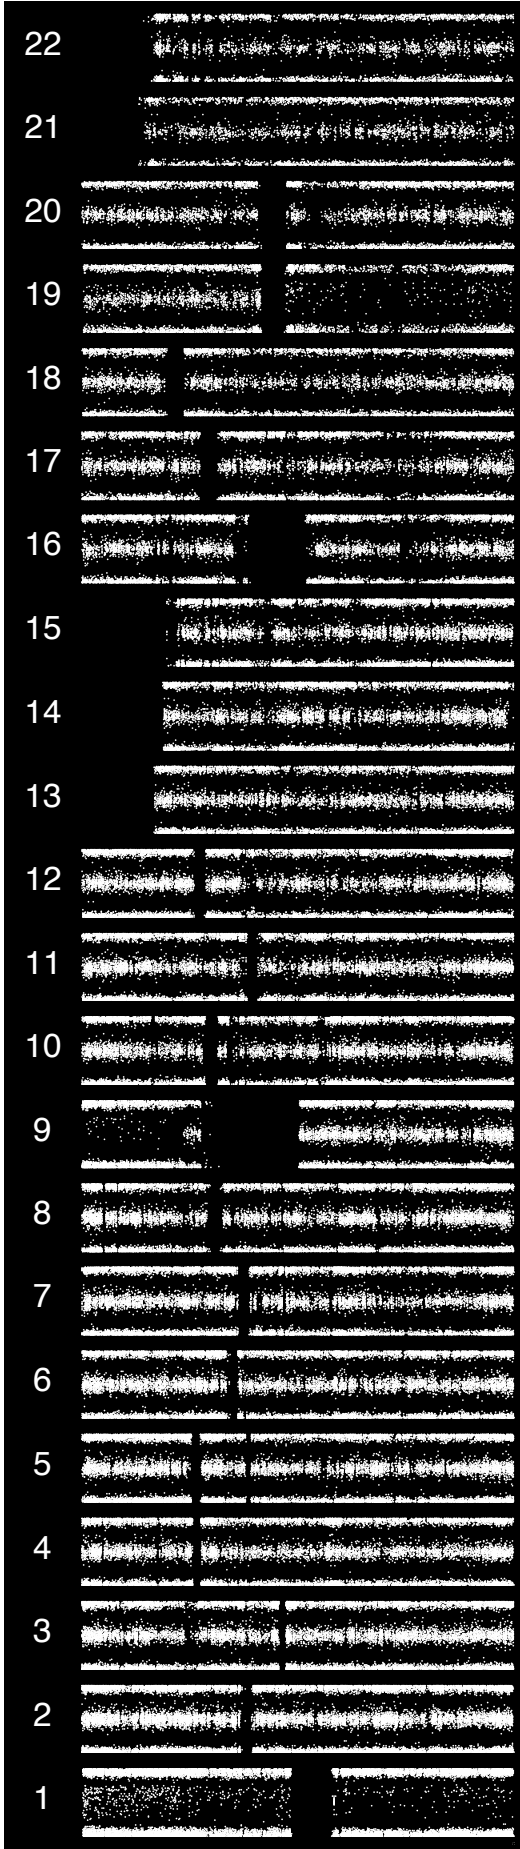

b

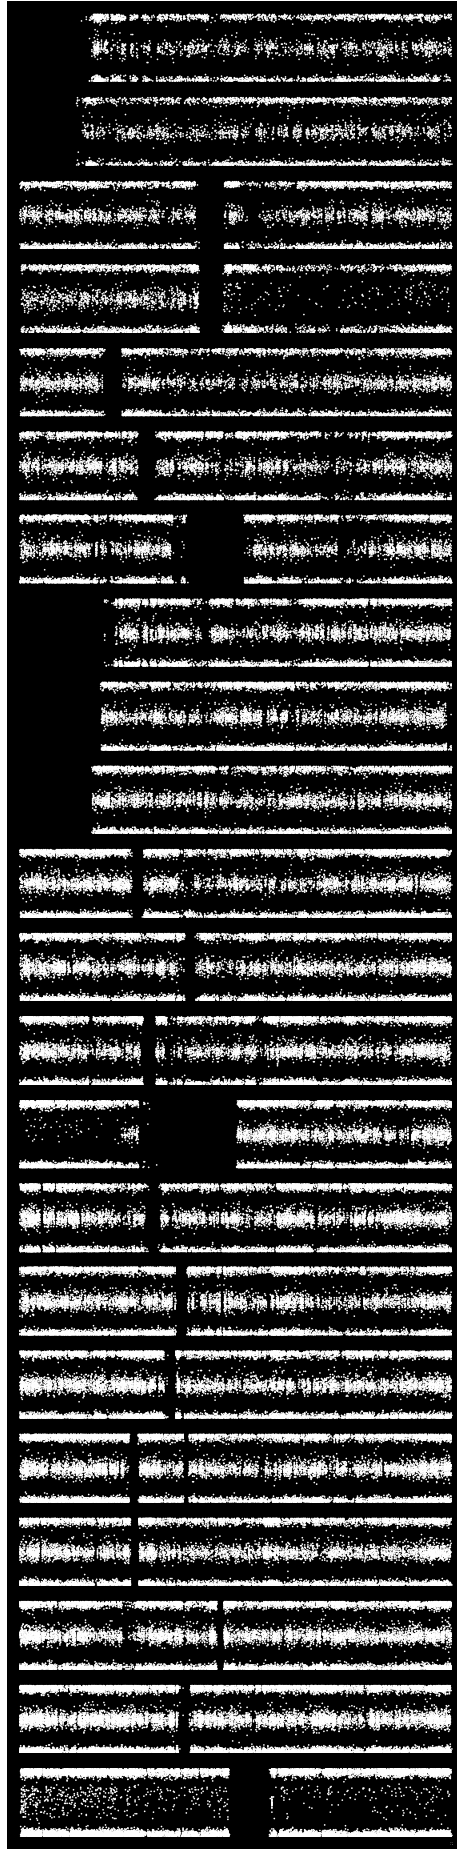

c

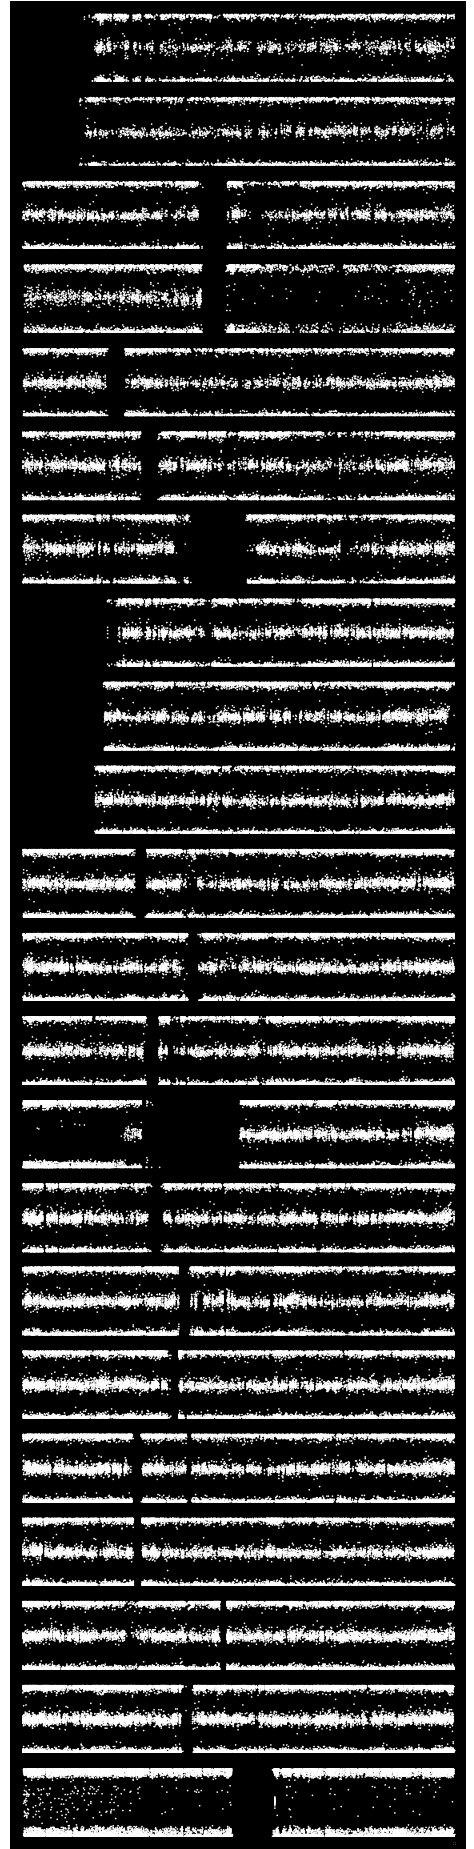

Supplement: NIHMS1001492-supplement-Supplementary_figure_2.pdf [file NIHMS1001492-supplement-Supplementary_figure_2.pdf]

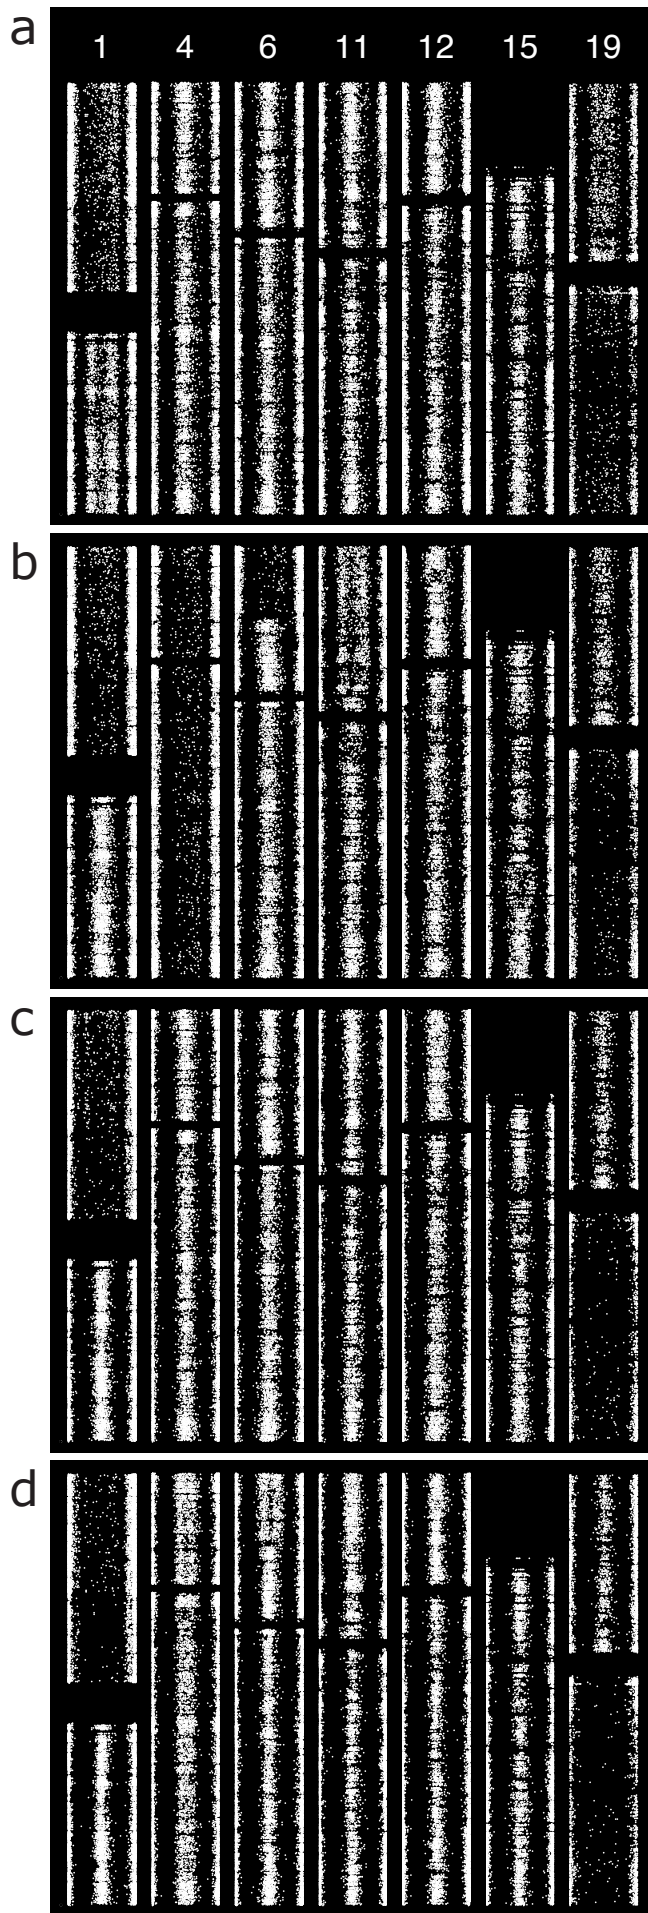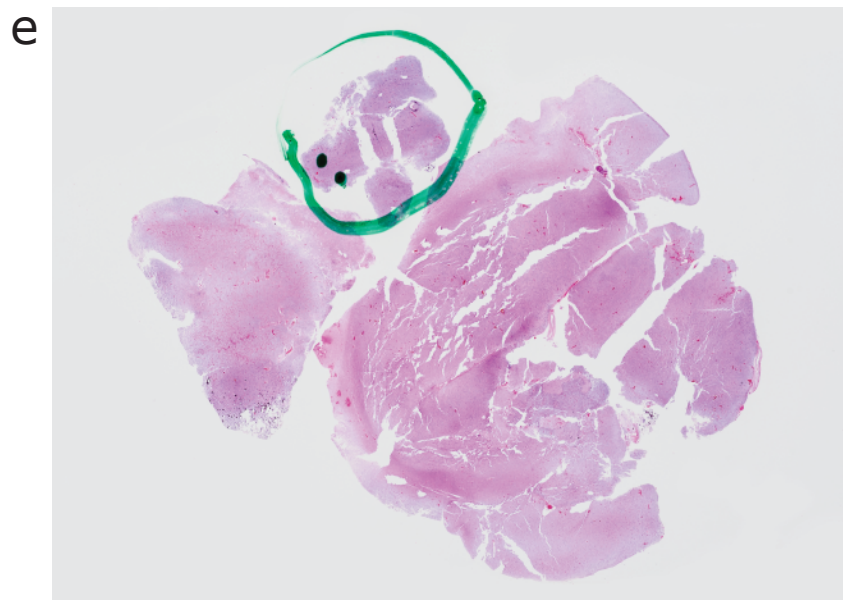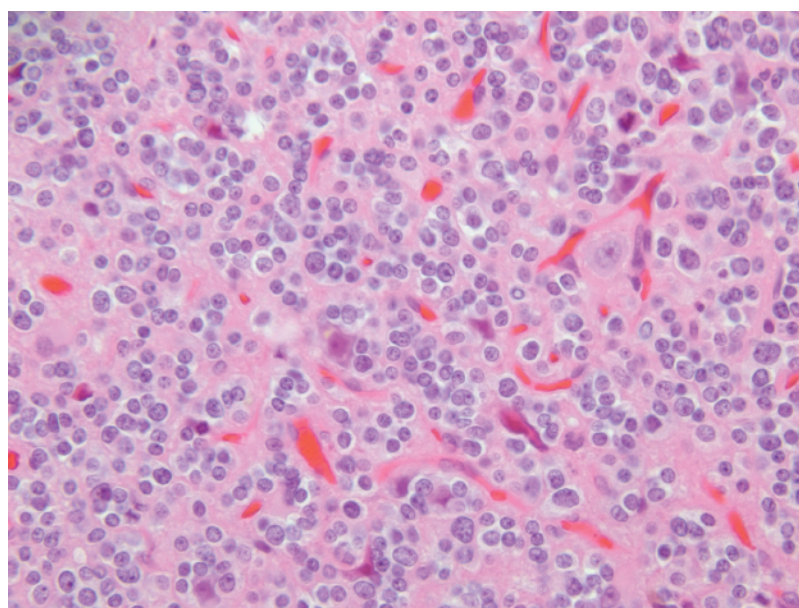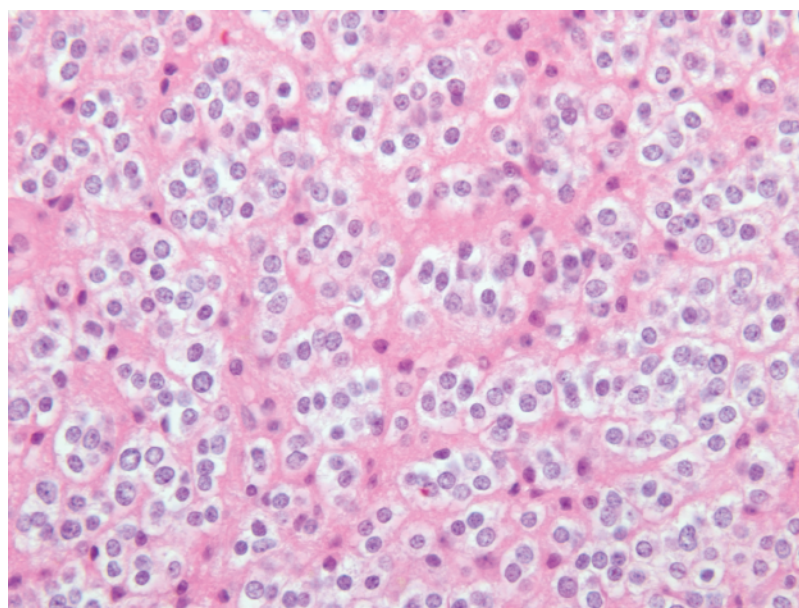

Supplement: NIHMS1001492-supplement-Supplementary_figure_3.pdf [file NIHMS1001492-supplement-Supplementary_figure_3.pdf]
